# Supplementary material for: Genome-Wide Identification and Expression Analysis of Chitinase-like Genes in Petunia axillaris
Source: Plants (Basel). 2022 May 9;11(9):1269. doi: 10.3390/plants11091269 (PMC9100346; doi:10.3390/plants11091269)
Supplement: Supplementary file 1 [file plants-11-01269-s001.zip › Tables S1¿CS8.xls]

## Sheet: Table S1
Table S1. The Chitinase-Like gene (CTLs) family members identified in P. axillaris
Gene ID	Scaffold	Genome location	Length (AA)	Sub-family	Signal peptide prediction	Strand
Peaxi162Scf00274g00746.1	Scaffold 274	Peaxi162Scf00274:744151..746011	339	GH19	secreted	+
Peaxi162Scf00274g00749.1	Scaffold 274	Peaxi162Scf00274:766059..767922	339	GH19	secreted	+
Peaxi162Scf00111g00047.1	Scaffold 111	Peaxi162Scf00111:462806..481168	149	GH19	-	+
Peaxi162Scf00078g01219.1	Scaffold 78	Peaxi162Scf00078:1213981..1215607	338	GH19	secreted	+
Peaxi162Scf00875g00019.1	Scaffold 875	Peaxi162Scf00875:88872..90720	327	GH19	secreted	+
Peaxi162Scf01261g00011.1	Scaffold 1261	Peaxi162Scf01261:69930..71231	254	GH19	secreted	-
Peaxi162Scf00580g00512.1	Scaffold 580	Peaxi162Scf00580:548199..551594	236	GH19	secreted	+
Peaxi162Scf00180g00126.1	Scaffold 180	Peaxi162Scf00180:141558..147917	503	GH19	secreted	+
Peaxi162Scf00568g00520.1	Scaffold 568	Peaxi162Scf00568:584488..585816	273	GH19	secreted	+
Peaxi162Scf00286g10022.1	Scaffold 286	Peaxi162Scf00286:200359..202078	319	GH19	secreted	+
Peaxi162Scf00323g00719.1	Scaffold 323	Peaxi162Scf00323:695852..699132	289	GH19	secreted	+
Peaxi162Scf00411g00083.1	Scaffold 411	Peaxi162Scf00411:936075..936989	304	GH18	secreted	+
Peaxi162Scf00836g00035.1	Scaffold 836	Peaxi162Scf00836:359649..360563	304	GH18	secreted	+
Peaxi162Scf03664g00001.1	Scaffold 3664	Peaxi162Scf03664:3..905	301	GH18	secreted	-
Peaxi162Scf00836g00311.1	Scaffold 836	Peaxi162Scf00836:356260..358162	450	GH18	-	+
Peaxi162Scf00589g00225.1	Scaffold 589	Peaxi162Scf00589:270013..271099	269	GH18	-	-
Peaxi162Scf00616g00611.1	Scaffold 616	Peaxi162Scf00616:646783..647703	306	GH18	secreted	-
Peaxi162Scf00616g00612.1	Scaffold 616	Peaxi162Scf00616:649713..650633	306	GH18	secreted	-
Peaxi162Scf00836g00039.1	Scaffold 836	Peaxi162Scf00836:302720..304121	299	GH18	secreted	+
Peaxi162Scf00167g00056.1	Scaffold 167	Peaxi162Scf00167:545300..545859	95	GH18	secreted	+
Peaxi162Scf00347g00043.1	Scaffold 347	Peaxi162Scf00347:403082..408825	257	GH18	-	-
Peaxi162Scf00403g00838.1	Scaffold 403	Peaxi162Scf00403:819567..820656	276	GH18	mito	+
Peaxi162Scf00904g00048.1	Scaffold 904	Peaxi162Scf00904:492092..492979	295	GH18	secreted	+
Peaxi162Scf00403g00840.1	Scaffold 403	Peaxi162Scf00403:811622..812717	295	GH18	secreted	+
Peaxi162Scf01254g00005.1	Scaffold 1254	Peaxi162Scf01254:25273..26175	300	GH18	secreted	-
Peaxi162Scf00585g00083.1	Scaffold 585	Peaxi162Scf00585:846770..847861	241	GH18	-	-
Peaxi162Scf01254g00009.1	Scaffold 1254	Peaxi162Scf01254:158200..159096	298	GH18	secreted	-
Peaxi162Scf00403g00519.1	Scaffold 403	Peaxi162Scf00403:579300..587129	465	GH18	mito	+
Peaxi162Scf00045g00450.1	Scaffold 45	Peaxi162Scf00045:423501..424811	325	GH18	-	+
Peaxi162Scf00177g00093.1	Scaffold 177	Peaxi162Scf00177:919832..920953	373	GH18	secreted	+
Peaxi162Scf00347g00041.1	Scaffold 347	Peaxi162Scf00347:408896..409900	295	GH18	-	+
Peaxi162Scf00347g00056.1	Scaffold 347	Peaxi162Scf00347:540411..541502	363	GH18	secreted	-
Peaxi162Scf00347g00420.1	Scaffold 347	Peaxi162Scf00347:438034..440026	382	GH18	secreted	-

## Sheet: Table S2
Table S2. Prediction of subcellular localization of the PaCTL proteins
GENE	CELL02G0 (E-value < 0.001)a	BUSCA(score)b	WoLF PSORT(similarity)c
Pa00274g00746.1	exd	ex (0.99)	ex: 5, V: 4, G: 4, C: 1
Pa00274g00749.1	ex	ex (0.99)	ex: 5, G: 4, V: 3, C: 1, N: 1
Pa00111g00047.1	ex, P	N (1)	ex: 10, N: 3, C: 1
Pa00078g01219.1	ex	ex (1)	ex: 8, V: 3, G: 3
Pa00875g00019.1	ex	ex (1)	ex: 8, V: 3, G: 3
Pa01261g00011.1	ex	P (0.62), ES (0.56)	ex: 10, C: 1, M: 1, V: 1, G: 1
Pa00580g00512.1	ex	ex (1)	C: 10, ex: 4
Pa00180g00126.1	ex	ex (1)	ex: 4, V: 4, C: 2, G: 2, N: 1, P: 1
Pa00568g00520.1	ex	ex (0.99)	ex: 5, G: 4, V: 3, C: 1, N: 1
Pa00286g10022.1	ex, L	ex (0.99)	ex: 10, V: 2, G: 2
Pa00323g00719.1	ex, L	ex (1)	ex: 11, G: 2, E: 1
Pa00411g00083.1	P, ex	ex (0.99)	cyt: 6, C: 3, N: 3, ex: 1, Pe: 1
Pa00836g00035.1	ex, P	ex (0.99)	G: 4, P: 3.5, E.P: 2.5, M: 2, ex: 2, C: 1, cyt: 1
Pa03664g00001.1	ex, P	ex (0.99)	G: 4, P: 3.5, E.P: 2.5, M: 2, ex: 2, C: 1, cyt: 1
Pa00836g00311.1	V, ex, P	ES (0.99)	cyt: 5, cyt.N: 4.3, cyt.Pe: 3.3, N: 2.5, G: 2, P: 1.5, E.P: 1.5, ex: 1, V: 1
Pa00589g00225.1	P	N (1)	cys: 13, N: 1
Pa00616g00611.1	P, ex, V	ex (1)	cyt: 10, N: 2, ex: 1, G: 1
Pa00616g00612.1	P	ex (1)	E: 5.5, cyt: 5, E.P: 3.5, C: 1, N: 1, M: 1
Pa00836g00039.1	V, ex	C (1)	cyt: 7, N: 4, C: 1, P: 1, cys: 1
Pa00167g00056.1	ex	ex (1)	ex: 11, V: 3
Pa00347g00043.1	N, C, ex	ex (0.83), N (0.17)	N: 9, cyt: 5
Pa00403g00838.1	ex	C (1)	N: 7, C: 2, M: 2, P: 1.5, G.P: 1.5, cys: 1
Pa00904g00048.1	P, ex	ex (1)	ex: 4, M: 3, V: 3, C: 1, N: 1, E: 1, G: 1
Pa00403g00840.1	ex	ex (0.98)	ex: 8, C: 2, M: 2, cyt: 1, E: 1
Pa01254g00005.1	ex	ex (0.97)	C: 7, Pe: 6, cyt.N: 1
Pa00585g00083.1	ex	N (1)	C: 9, cyt: 3, M: 1, N.P: 1
Pa01254g00009.1	ex	ex (1)	C: 4, E: 3, P: 2, Pe: 2, cyt: 1.5, cyt.N: 1.5, V: 1
Pa00403g00519.1	P, M	C (0.65), M (0.35)	P: 8, M: 2, E: 2, C: 1, Pe: 1
Pa00045g00450.1	V	N (1)	N: 6, cyt: 6, P: 1, Pe: 1
Pa00177g00093.1	P, ex	ES (0.95)	C: 7, V: 2, E: 2, N: 1, M: 1, ex: 1
Pa00347g00041.1	ex, P	C (0.88), M (0.12)	C: 7, M: 6, N: 1
Pa00347g00056.1	P, ex	ex (1)	C: 10, ex: 2, cyt: 1, V: 1
Pa00347g00420.1	ex, P	ex (0.89)	ex: 7, V: 2, E.P: 2, P:1.5, E: 1.5, M: 1, G: 1
Note: The three programs for prediction use different criteria, please see respective original publication for details. aCELLO2GO, http://cello.life.nctu.edu.tw/cello2go/ bBUSCA, http://busca.biocomp.unibo.it/ cWoLF PSORT, https://wolfpsort.hgc.jp/
d C, chloroplast; cys,cytoskeleton; cyt, cytosolic; cyt.N, cytosolic-nucleus; cyt.Pe, cytosolic-peroxisome; E, endoplasmic reticulum; E.P, endoplasmic reticulum-plasma membrane; ES, endomembrane system; ex, extracellular; G, Golgi apparatus; G.P, Golgi apparatus-plasma membrane; L, lysosomal; M, mitochondrial; N, nucleus; N.P, nucleus-plasma membrane; P, plasma membrane; Pe, peroxisome; V, tonopl…

## Sheet: Table S3
Table S3. Calculation of substitution rates of homologues CTLs between S. lycopersicum and P. axillaris. Paralogous gene pairs were screened from the Solanaceae genome website (Sol genomics network: https://solgenomics.net/) with an amino acid sequence similarity ≥80%.
Class	Gene pair		Ka	Ks	Ka / Ks	EffectiveLen	AverageS-sites	AverageN-sites
Ⅰ	Pa00323g00719.1	Solyc12g098810.2	0.064	0.3543	0.1806	867	198.3	668.7
	Pa00323g00719.1	Solyc09g098540.3	0.1406	0.7628	0.1843	852	196.2	655.8
	Pa00286g10022.1	Solyc12g098810.2	0.1144	0.8743	0.1309	957	215.7	741.3
	Pa00286g10022.1	Solyc09g098540.3	0.0796	0.4887	0.1628	951	215.8	735.2
Ⅱ	Pa00580g00512.1	Solyc02g082960.3	0.1373	0.7536	0.1822	708	166.2	541.8
	Pa00580g00512.1	Solyc02g061770.3	0.1242	0.5257	0.2362	708	166.9	541.1
	Pa01261g00011.1	Solyc02g061770.3	0.3238	1.4392	0.225	744	178.7	565.3
	Pa00875g00019.1	Solyc10g055810.2	0.0884	0.6615	0.1336	963	229.4	733.6
	Pa00875g00019.1	Solyc10g055800.2	0.1033	0.6409	0.1611	972	230.9	741.1
	Pa00875g00019.1	Solyc10g055820.2	NaN	NaN	NaN	942	221.4	719.1
	Pa00875g00019.1	Solyc10g074390.1	0.1434	0.7517	0.1908	639	149.9	489.1
	Pa00875g00019.1	Solyc10g074360.1	0.2042	0.725	0.2817	462	106.3	355.7
	Pa00875g00019.1	Solyc10g074460.2	NaN	NaN	NaN	579	141.3	436.2
	Pa00875g00019.1	Solyc10g068350.1	0.1253	0.4856	0.2582	258	58.8	199.2
	Pa00875g00019.1	Solyc10g074380.2	NaN	NaN	NaN	195	44.5	149
	Pa00875g00019.1	Solyc10g055790.1	0.2106	1.1565	0.1821	216	52.6	163.4
	Pa00078g01219.1	Solyc10g074460.2	NaN	NaN	NaN	585	143.2	440.3
	Pa00078g01219.1	Solyc10g074380.2	NaN	NaN	NaN	195	47.3	146.2
	Pa00078g01219.1	Solyc10g074400.2	NaN	NaN	NaN	519	119.2	398.3
Ⅳ	Pa00180g00126.1	Solyc06g053380.3	0.1683	0.5428	0.3101	816	190.9	625.1
	Pa00180g00126.1	Solyc04g072000.3	0.1786	0.7612	0.2347	816	188.9	627.1
	Pa00568g00520.1	Solyc04g072000.3	0.0836	0.6673	0.1252	810	187.3	622.8
	Pa00568g00520.1	Solyc06g053380.3	0.1852	0.7525	0.2461	819	191.8	627.3
Ⅲ	Pa00616g00612.1	Solyc11g072760.1	0.0678	0.3572	0.1899	918	216.4	701.6
	Pa00616g00612.1	Solyc11g072750.1	0.0875	0.3707	0.236	918	215.4	702.6
	Pa00616g00611.1	Solyc11g072760.1	0.0654	0.3487	0.1875	918	215.2	702.8
	Pa00616g00611.1	Solyc11g072750.1	0.056	0.3003	0.1866	918	214.2	703.8
	Pa00836g00035.1	Solyc11g072830.1	0.0807	0.5654	0.1428	912	206.5	705.5
	Pa03664g00001.1	Solyc11g072830.1	0.08	0.553	0.1447	903	204.5	698.5
	Pa00836g00311.1	Solyc11g072830.1	0.0895	0.6181	0.1448	909	205.8	703.2
	Pa00411g00083.1	Solyc11g072830.1	0.0815	0.6825	0.1194	912	206.4	705.6
	Pa00589g00225.1	Solyc11g005890.1	0.0841	0.5111	0.1645	774	176.8	597.2
	Pa01254g00005.1	Solyc01g095310.1	0.0675	0.6	0.1124	900	217.9	682.1
	Pa00403g00840.1	Solyc05g050130.3	0.0999	0.5797	0.1723	876	213	663
	Pa00904g00048.1	Solyc01g095310.1	0.3263	2.1269	0.1534	885	212.6	672.4
	Pa01254g00009.1	Solyc01g095250.1	0.0376	0.3047	0.1233	894	211.7	682.3
	Pa01254g00009.1	Solyc01g095260.1	0.0516	0.2898	0.1781	894	212.2	681.8
Ⅴ	Pa00347g00420.1	Solyc07g005100.3	0.1528	0.6983	0.2188	1122	262.3	859.7
	Pa00347g00041.1	Solyc07g005080.1	0.1408	0.3475	0.4051	885	209.8	675.2

## Sheet: Table S4
Table S4. Number of CTLs in the five Solanaceae species and A. thaliana genomes
Sub-group	Number of putative orthologs
	Arabidopsis thaliana	Petunia axillaris	Nicotiana tabacum	Capsicum annuum	Solanum lycopersicum	Solanum tuberosum
GH18
Class III	2	17	14	17	21	15
Class V	9	5	7	5	3	2
GH19
Class I	2	2	4	2	2	2
Class II	3	7	8	8	14	14
Class IV	9	2	6	5	3	2
Total	25	33	39	37	43	35

## Sheet: Table S5
Table S5. The Ka / Ks analysis of PaCTLs gene pairs. The amino acid sequence similarity of paralogous gene pairs were ≥ 80%. Mode Ⅰ: The paralogous genes showed selective expression under normal growth conditions; Mode Ⅱ: Both of the paralogous genes showed very low expression levels.
Paralogous pairs				Ka		Ks		Ka / Ks		AverageS-sites		AverageN-sites		Duplication style		Gene expression mode
Pa00274g00749.1		Pa00274g00746.1		0.025		0.0124		2.0178		244.2		772.8		positive selection		Ⅰ
Pa00836g00035.1		Pa03664g00001.1		0		0		-		205.3		697.7		-		Ⅱ
Pa00836g00035.1		Pa00411g00083.1		0.0267		0.2598		0.1029		207.3		704.8		purify selection		Ⅱ
Pa00836g00035.1		Pa00836g00311.1		0.0115		0.05		0.2294		206.7		702.3		purify selection		Ⅱ
Pa00411g00083.1		Pa03664g00001.1		0.027		0.2559		0.1055		205.3		697.8		purify selection		Ⅱ
Pa00411g00083.1		Pa00836g00311.1		0.039		0.3019		0.129		206.6		702.4		purify selection		Ⅱ
Pa03664g00001.1		Pa00836g00311.1		0.0072		0.0453		0.1589		204.8		698.2		purify selection		Ⅱ
Pa00616g00611.1		Pa00616g00612.1		0.0607		0.2985		0.2035		215.3		702.8		purify selection		Ⅱ

## Sheet: Table S6
Table S6. Statistical information of the gene expression of PaCTLs under normal and stress environment conditions.
Gene ID	Highly-expressed tissue	Expression regulated by
Pa00274g00746.1	Bud(2-3cm)	42℃(16.1-folds up)
Pa00274g00749.1		42℃(796.7-folds up)
Pa00111g00047.1		42℃(4-folds down)\Nacl(13.1-folds down)
Pa00078g01219.1	Root\Bud(2-3cm)\Flower	Nacl(4.3-folds up)
Pa00875g00019.1	Root	42℃(3.5-folds down)\drought(4.5-folds down)
Pa01261g00011.1	Stem\Leaf\Bud(2-3cm)\Flower	Nacl(6.6-folds down)
Pa00580g00512.1	Root\Leaf\Bud(2-3cm)\Tender capsule	42℃(4.5-folds down)
Pa00180g00126.1		4℃(3.8-folds up)\42℃(3.3-folds down)
Pa00568g00520.1	Bud(2-3cm)	42℃(4.7-folds down)
Pa00286g10022.1	Root\Stem\Leaf\Bud\Flower\Tender capsule	Nacl(11-folds down)
Pa00323g00719.1	Root\Bud\Flower\Tender capsule	42℃(117-folds up)\drought(3.8-folds down)\Nacl(8.7-folds down)
Pa00411g00083.1		42℃(10.7-folds down)\drought(4.1-folds down)
Pa00836g00035.1		42℃(15.6-folds down)\drought(5.3-folds down)
Pa03664g00001.1		42℃(16.7-folds down)\drought(4.6-folds down)
Pa00836g00311.1		drought(4.6-folds down)
Pa00589g00225.1		42℃(3.7-folds down)\drought(4.3-folds down)
Pa00616g00611.1		drought(119.3-folds down)
Pa00616g00612.1		42℃(40-folds down)\drought(275.8-folds down)
Pa00836g00039.1		42℃(20.5-folds up)\Nacl(11.3-folds up)
Pa00167g00056.1		drought(10.9-folds up)\Nacl(15.1-folds up)
Pa00347g00043.1
Pa00403g00838.1	Bud(4-5cm)\Flower
Pa00904g00048.1		drought(3-folds up)\ Nacl(6-folds up)
Pa00403g00840.1	Root\Stem\Leaf\Bud\Flower\Tender capsule	42℃(3-folds down)\Nacl(6.3-folds down)
Pa01254g00005.1		4℃(3-folds up)\ 42C(380.5-folds up)\Nacl(7.6-folds down)
Pa00585g00083.1		drought(3.5-folds down)
Pa01254g00009.1		4℃(10.2-folds up)
Pa00403g00519.1	Bud\Tender capsule	Nacl(3.7-folds down)
Pa00045g00450.1		42℃(5.1-folds down)\drought(4.4-folds down)\Nacl(4-folds down)
Pa00177g00093.1		drought(4.3-folds down)
Pa00347g00041.1		4℃(9.1-folds up)\42C(144.3-folds up)\drought(6.4-folds up)\Nacl(4.6-folds up)
Pa00347g00056.1		Nacl(8.3-folds up)\42℃(10.7-folds down)
Pa00347g00420.1		drought(6.6-folds down)\Nacl(4-folds down)

## Sheet: Table S7
Table S7. The qRT-PCR primer for PaCTLs.
Gene ID	Forward primer sequence (5'→3')	Reverse primer sequence (5'→3')
Pa00274g00746.1	TAAAAGGGAGGTTGCTGCGT	ATGTCAGCTGGGTTGCCTAC
Pa00274g00749.1	CCAGAGGGTCCAGGATCGTA	GCCGTAGCCAAAAGGAGTCT
Pa00111g00047.1	CCCCATCCGACATAGCTGAC	CCATAGTCTGCGAAGCCCAA
Pa00078g01219.1	AATCGCCTCCCTGGATTTGG	TCCGATCTTGGACCCTAGCA
Pa00875g00019.1	GACAATGGCAACCATCAGGC	GCCATGACCACATTCCAAGC
Pa01261g00011.1	ACACCACAGGGTAACAAGCC	CTGGTACACGATTCGCCGAT
Pa00580g00512.1	AGCTCCTGATGGCCCATTTT	TCTTCCAGCTGGTCCGTAGT
Pa00180g00126.1	GTGGCAATCCTCCCTCTGTT	GCCAGGGTTAGTCTCGGAAC
Pa00568g00520.1	TGCGATTGAATGCGATGGTG	AGATTATCCCCCGTCTCCACA
Pa00286g10022.1	ATTATGGACGTGGTGCCCTG	CAGCCTGGAAAGCCATGGTA
Pa00323g00719.1	AAAGGGTCAGCCTTCAGCTC	AACCGGGAACTCGTTTAGCC
Pa00411g00083.1	CCAAACTATGCAGCACCTGG	CCACACCAGAGTGAATGGGG
Pa00836g00035.1	CGCGTATGATGAGGGAACCA	AATCCCCCACTCCCATCACT
Pa03664g00001.1	CACCTATCGATGCAGCACCT	TCAACACCAGAGTGAATGGGG
Pa00836g00311.1	TGGATTTTTCACAGCGTGCAG	TTTCGTACGGGGCAATCGAA
Pa00589g00225.1	GCAGACCCTTCAGGGAACC	TTAGTGGCTGCAACCGAATCT
Pa00616g00611.1	AAGGGCACAACCATTCCTCAA	TGCTTAGGAGACAAGCCACC
Pa00616g00612.1	GCTCTCCGGTTTTCAGGGAA	CGCCATTTGTTGGTTCTGGT
Pa00836g00039.1	GGTGCAGAATCCAACTCCGT	GTAGGTGAAGGGTGCGAGTT
Pa00167g00056.1	GCCGTCGTTATGCTACAAGC	ACGACGTTCCCCGTCTTTAT
Pa00347g00043.1	AAGCCTGGAACTAGAGGCGA	TTCCCTTGAATGTGCGGCTA
Pa00403g00838.1	TGGAACCATTTTCTCGGGGG	CGCCGCGCTCAATATCAAAA
Pa00904g00048.1	TACTGGGGCCAAAATGGCAA	GGGTTGCAATGACCAGCAAG
Pa00403g00840.1	GGGAGCGCGGACAATCTAAA	CAGGAGCTGCTGGTAATCCC
Pa01254g00005.1	TGTTATCGATCGGGGGAGGT	TCCATCCAGAATCGCGTCAC
Pa00585g00083.1	GGTGCTCTACAAACAGGGCT	TCCACTGCTTCCATGCACTT
Pa01254g00009.1	TCCCTGCTGATGACCTCACT	TTGACCACAACATCACGCCA
Pa00403g00519.1	TGCAGGTGGGGGACCTATTA	GCACTTTTCTTCTCCCACTGC
Pa00045g00450.1	AGGCCGAATTGCTACGACAA	GTGCTAGTGTTCCAGGGTCC
Pa00177g00093.1	TTGCGGTTTTGATGGCCTTG	TATGGCAACACGCCATTCCT
Pa00347g00041.1	ACCATTCATTCCCAGAGCCC	TGGATGAATGCAGCACGACT
Pa00347g00056.1	AGTGCAACAACCACGTTTGA	GCCATGCAAAGTAACCGAGC
Pa00347g00420.1	GAAAATCGCCTGTTGGCTCC	CGTGGCTCGATTCTGCACTA
PaUBQ	TGGAGGATGGAAGGACTTTGG	CAGGACGACAACAAGCAACAG

## Sheet: Table S8
Table S8. The amplification primer for PaCTLs.
Gene ID	Forward primer sequence (5'→3')	Reverse primer sequence (5'→3')
Pa01254g00009.1	ATGGAAGGCCAATCAAGTAGAT	GACATGACTCTTGATTGAAGAA
Pa01254g00005.1	ATGGCAACCAATGTTTCAAATT	GACATGGCTCTTGATAGAAGAA
Pa00286g10022.1	ATGAGGATTTTGAGTTTGTTG	TCAAGAAGCAGCAGCAGGGGCA
Pa00347g00041.1	ATGATTAACTTCACAACTAC	GATTTCATCATCCCATGCCA
